# Supplementary material for: Boron-based binary Be6B102− cluster: three-layered aromatic sandwich, electronic transmutation, and dynamic structural fluxionality
Source: Royal Society of Chemistry journal article supplement (doi:10.1039/c8cp04332a), 2018-01-01

## SUPPLEMENTARY INFORMATION

### Boron-based binary $\text{Be}_6\text{B}_{10}^{2-}$ cluster: three-layered aromatic sandwich, electronic transmutation, and dynamic structural fluxionality

Lin-Yan Feng,<sup>a</sup> Jin-Chang Guo,<sup>ab</sup> Peng-Fei Li,<sup>a</sup> and Hua-Jin Zhai<sup>\*a</sup>

<sup>a</sup>*Nanocluster Laboratory, Institute of Molecular Science, Shanxi University, Taiyuan 030006, China*

<sup>b</sup>*Department of Chemistry, Xinzhou Teachers University, Xinzhou 034000, Shanxi, China*

E-mail: hj.zhai@sxu.edu.cn

### Supplementary Information – Part I

- Table S1.** Calculated orbital compositions for canonical molecular orbitals (CMOs) of the global-minimum (GM) structure of  $\text{Be}_6\text{B}_{10}^{2-}$  (**1**,  $C_{2v}$ ,  $^1A_1$ ) cluster. Main components are marked in red color.
- Figure S1.** Optimized geometries at PBE0/6-311+G(d) level of (a) salt complex cluster  $\text{Be}_6\text{B}_{10}\text{Na}_2$ , a local-minimum (LM) structure, and (b) re-optimized GM of  $\text{Be}_6\text{B}_{11}^-$  cluster (ref 11). Bond distances are in Å. B atoms are in red color, Be in yellow, and Na in purple.
- Figure S2.** An alternative AdNDP scheme for delocalized  $\pi$  and  $\sigma$  frameworks of  $\text{Be}_6\text{B}_{10}^{2-}$  (**1**) cluster, in which Be centers are excluded. The occupation numbers (ONs) are only slightly reduced with respect to those in the 16c-2e  $\pi/\sigma$  AdNDP scheme (see Fig. 7).
- Figure S3.** AdNDP bonding pattern for  $D_{10h}$   $\text{C}_{10}$  cluster.

- Figure S4.** Canonical molecular orbitals (CMOs) of the TS structure of  $\text{Be}_6\text{B}_{10}^{2-}$  cluster (see Fig. 2(c)).
- Figure S5.** AdNDP bonding pattern for the TS structure of  $\text{Be}_6\text{B}_{10}^{2-}$  cluster (Fig. 2(c)). ONs are shown.
- Figure S6.** Displacement vectors of (a) selected vibrational frequencies of GM  $\text{Be}_6\text{B}_{10}^{2-}$  (**1**) cluster and (b) those of two TS structures (**TS1** and **TS2**).

## Supplementary Information – Part II

**Three short movies** extracted from the molecular dynamics simulations for  $\text{Be}_6\text{B}_{10}^{2-}$  cluster at temperatures of 300, 600, and 1500 K.

**Table S1.** Calculated orbital compositions for canonical molecular orbitals (CMOs) of the global-minimum (GM) structure of  $\text{Be}_6\text{B}_{10}^{2-}$  (**1**,  $C_{2v}$ ,  $^1A_1$ ). Main components are marked in red color.

| CMO                                                                                            | B 2s/2p (%) | Be 2s/2p (%) | CMO                                                                                            | B 2s/2p (%) | Be 2s/2p (%) |
|------------------------------------------------------------------------------------------------|-------------|--------------|------------------------------------------------------------------------------------------------|-------------|--------------|
| 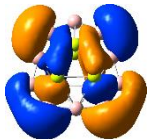<br>HOMO      | <b>89.0</b> | 8.2          | 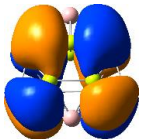<br>HOMO-2    | <b>65.3</b> | 26.5         |
| 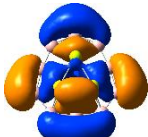<br>HOMO-1    | <b>85.7</b> | 12.0         | 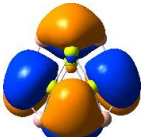<br>HOMO-3    | <b>70.2</b> | 28.6         |
| 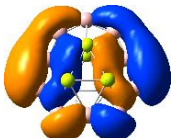<br>HOMO-6   | <b>93.3</b> | 5.7          | 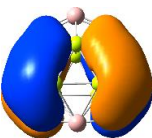<br>HOMO-10  | <b>76.9</b> | 22.1         |
| 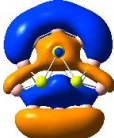<br>HOMO-7  | <b>91.1</b> | 8.0          | 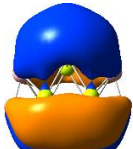<br>HOMO-9  | <b>75.4</b> | 23.4         |
| 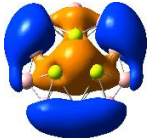<br>HOMO-13 | <b>78.7</b> | 20.6         | 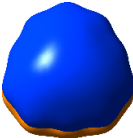<br>HOMO-14 | <b>60.0</b> | 38.1         |
| 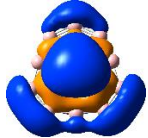<br>HOMO-5  | 39.3        | <b>58.9</b>  | 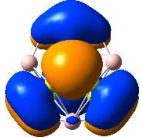<br>HOMO-4  | 32.8        | <b>66.1</b>  |

**Figure S1.** Optimized geometries at PBE0/6-311+G(d) level of (a) salt complex cluster  $\text{Be}_6\text{B}_{10}\text{Na}_2$ , a local-minimum (LM) structure, and (b) re-optimized GM of  $\text{Be}_6\text{B}_{11}^-$  cluster (ref 11). Bond distances are in Å. B atoms are in red color, Be in yellow, and Na in purple.

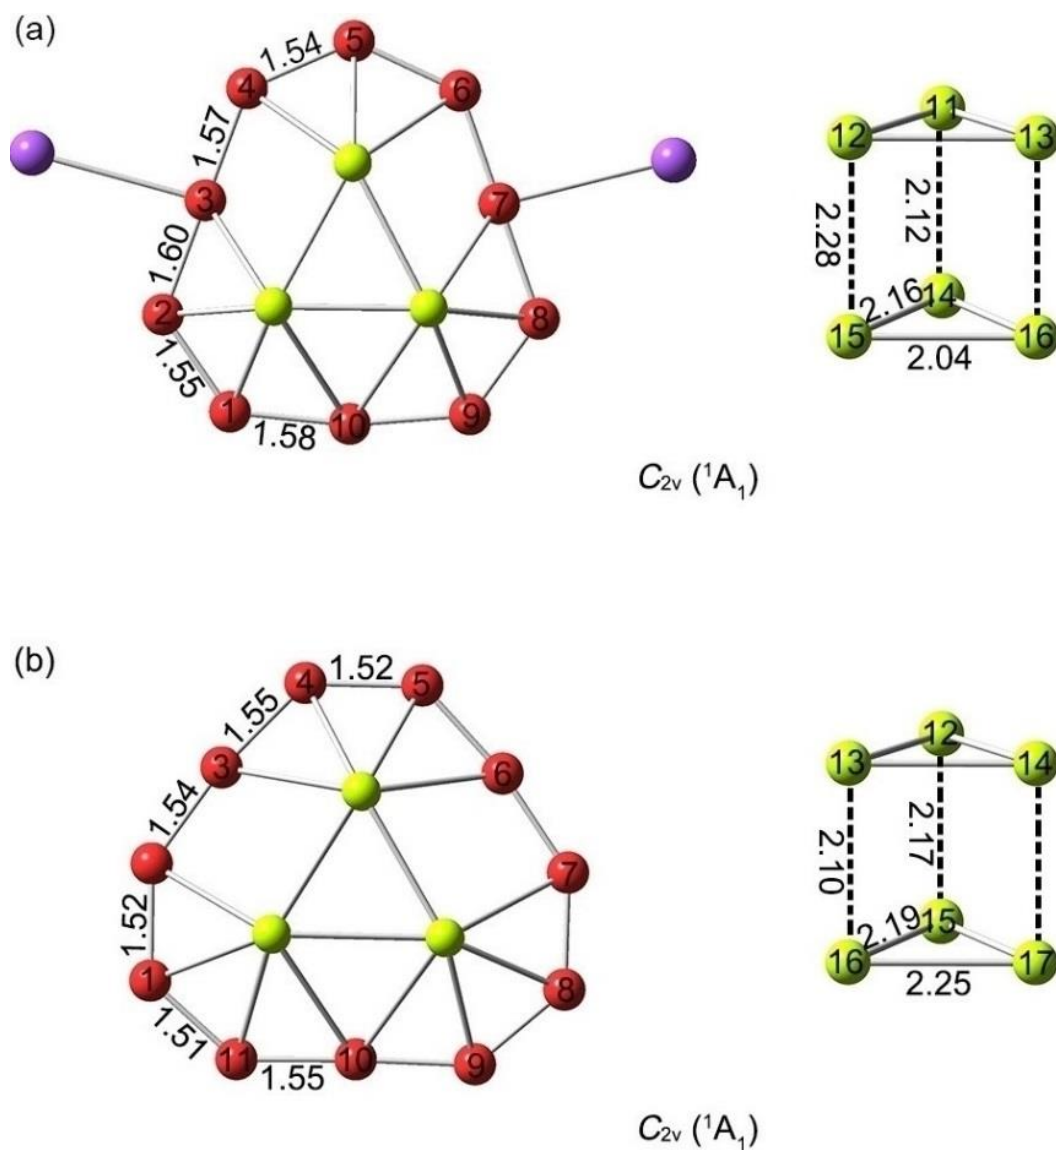

**Figure S2.** An alternative AdNDP scheme for delocalized  $\pi$  and  $\sigma$  frameworks of  $\text{Be}_6\text{B}_{10}^{2-}$  (**1**) cluster, in which Be centers are excluded. The occupation numbers (ONs) are only slightly reduced with respect to those in the 16c-2e  $\pi/\sigma$  AdNDP scheme (see Fig. 7).

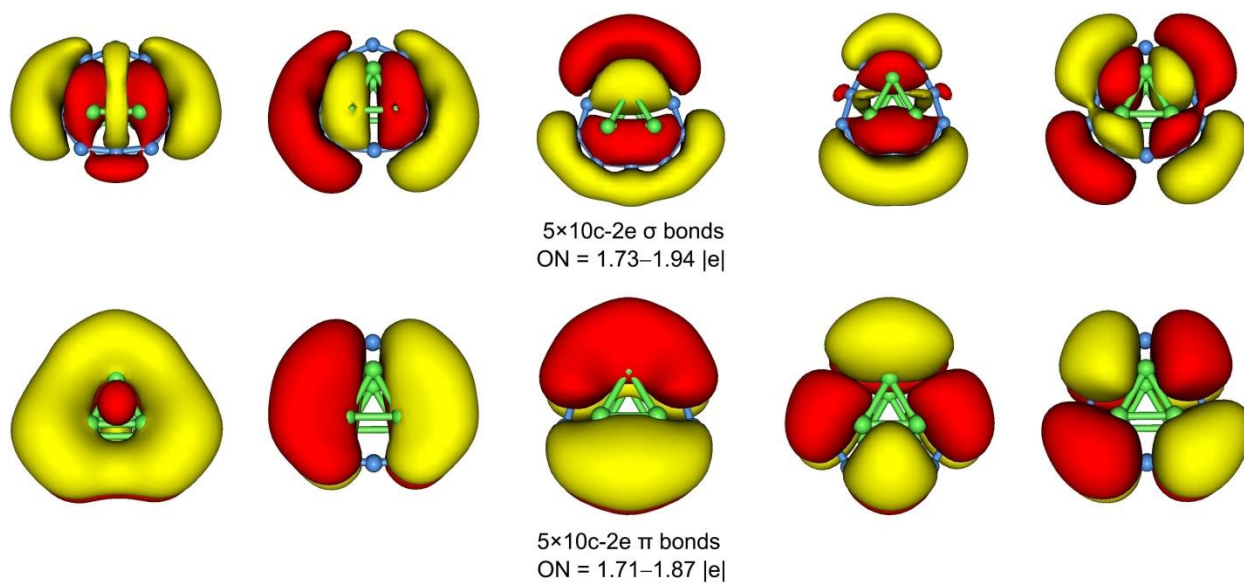

**Figure S3.** AdNDP bonding pattern for  $D_{10h}$   $C_{10}$  cluster.

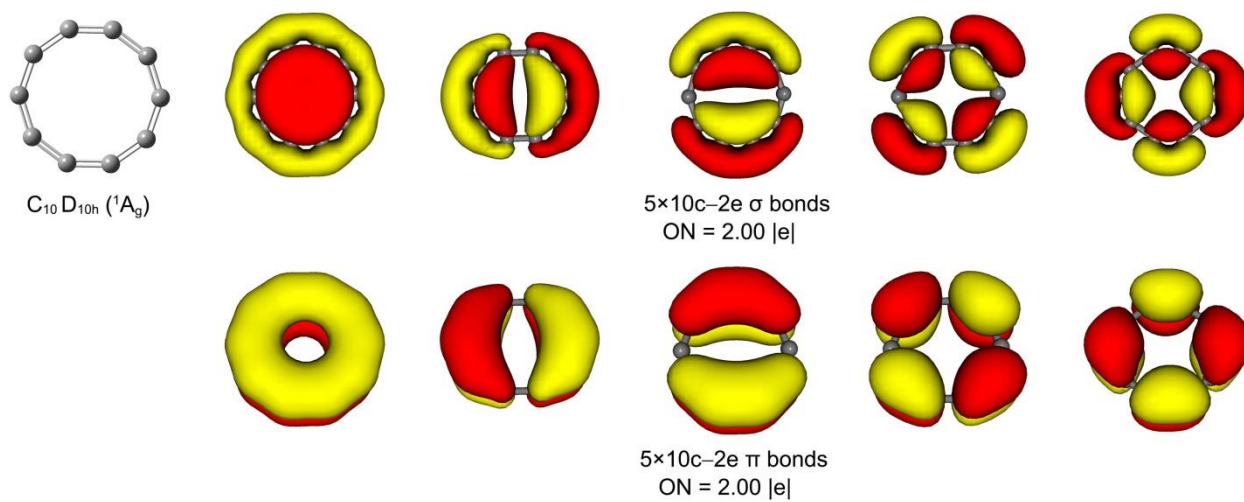

**Figure S4.** Canonical molecular orbitals (CMOs) of the TS structure of  $\text{Be}_6\text{B}_{10}^{2-}$  cluster (see Fig. 2(c)).

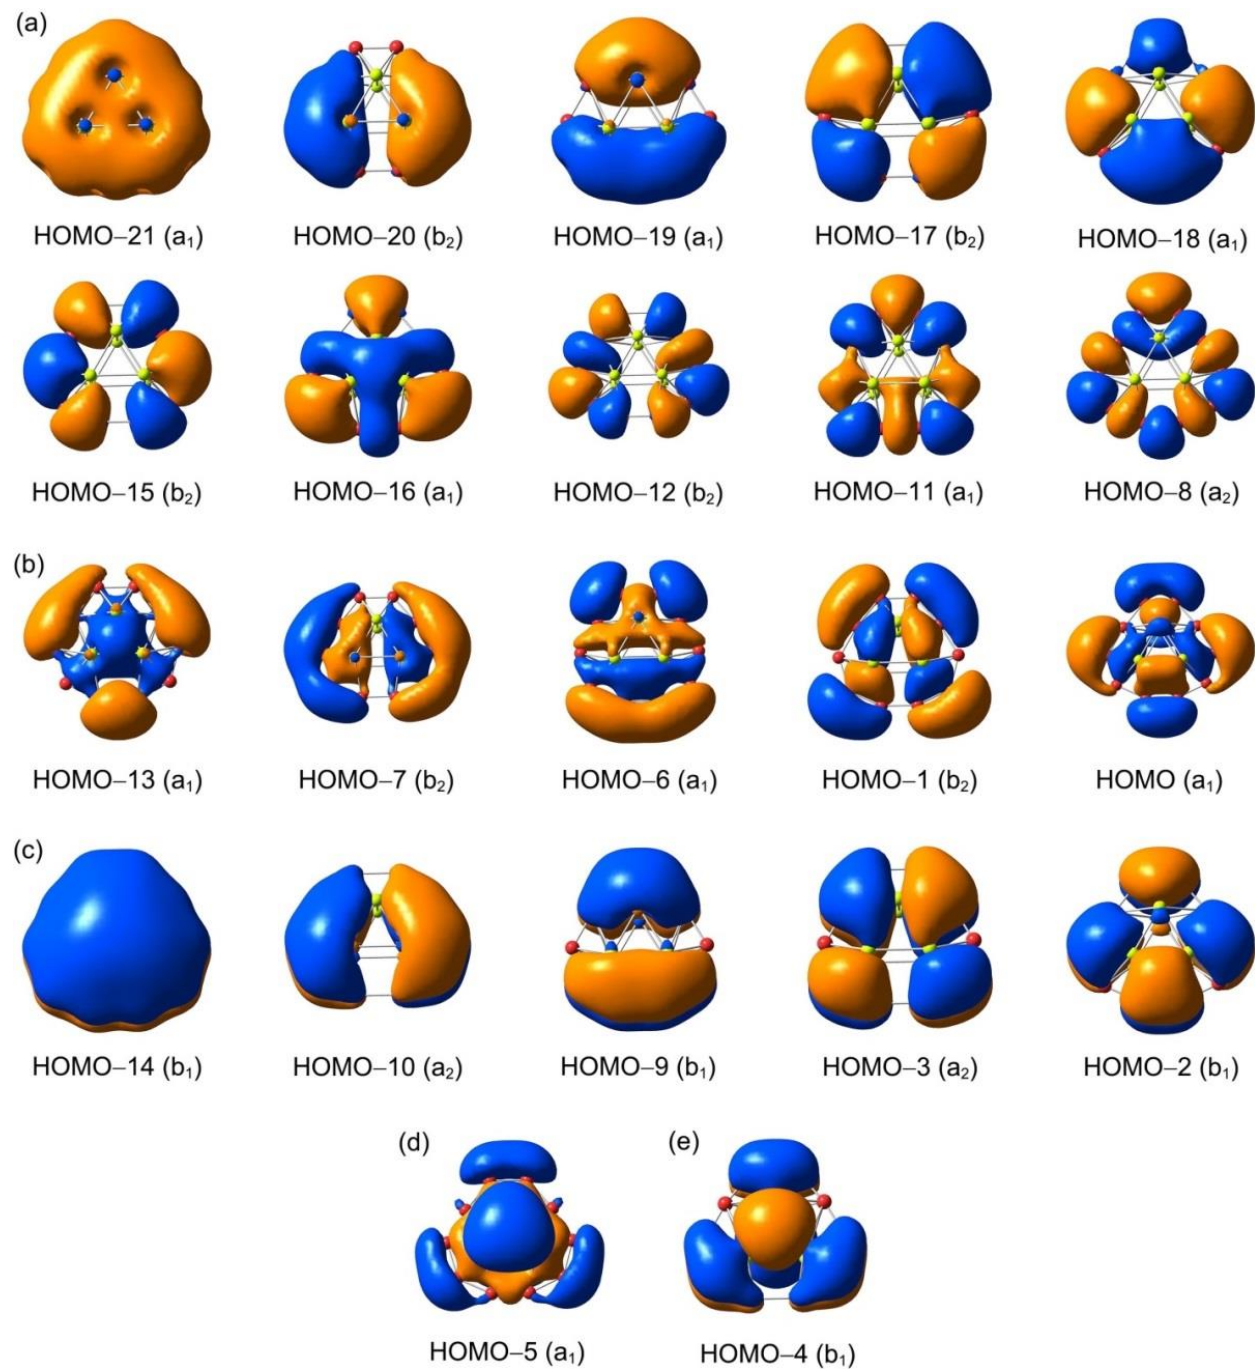

**Figure S5.** AdNDP bonding pattern for the TS structure of  $\text{Be}_6\text{B}_{10}^{2-}$  cluster (see Fig. 2(c)).  
ONs are shown.

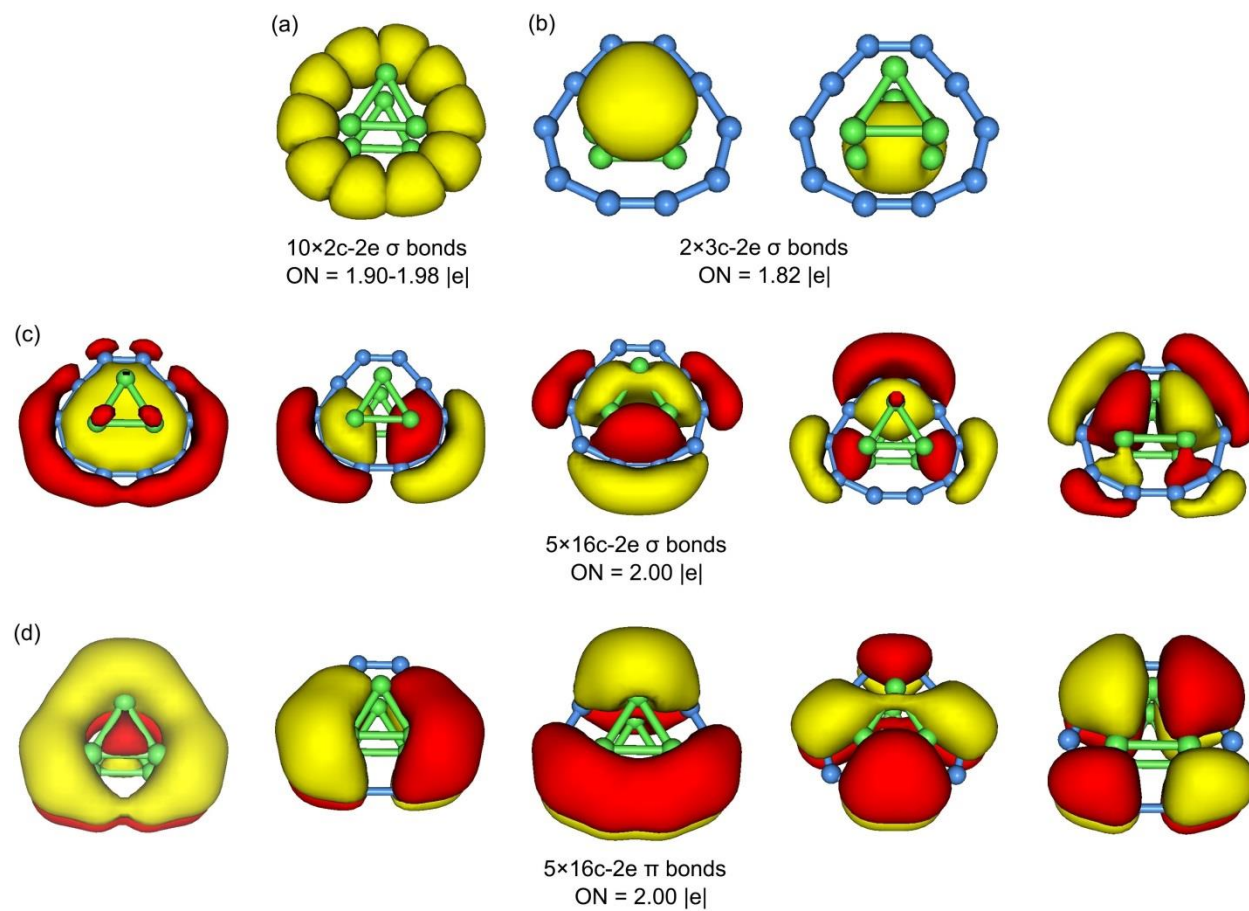

**Figure S6.** Displacement vectors of (a) selected vibrational frequencies of GM  $\text{Be}_6\text{B}_{10}^{2-}$  (**1**) cluster and (b) those of two TS structures (**TS1** and **TS2**).

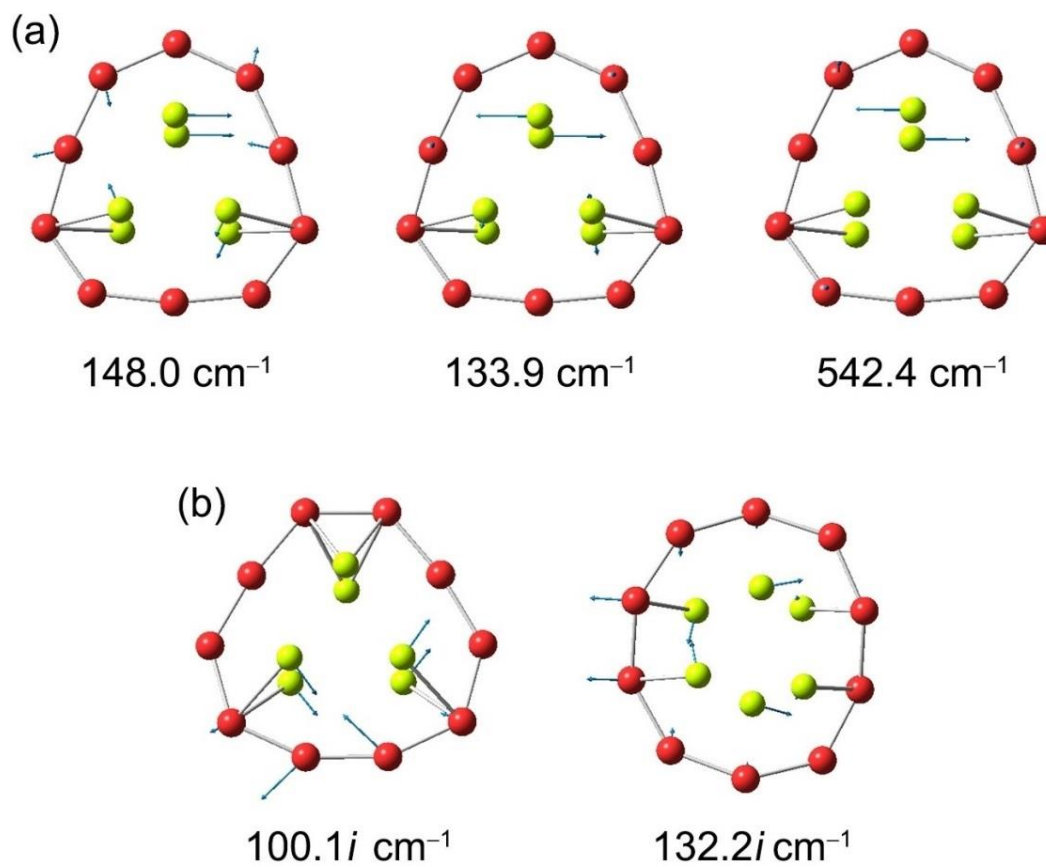

Supplement: c8cp04332a1.pdf [file c8cp04332a1.pdf]
